1 Meningococcal Deduced Vaccine Antigen Reactivity (MenDeVAR) Index: a  
2 Rapid and Accessible Tool that Exploits Genomic Data in Public Health and  
3 Clinical Microbiology Applications

4 **Running title:** MenDeVAR: genomic data for public health applications

5 Charlene M.C. Rodrigues, Department of Zoology, Peter Medawar Building for Pathogen Research,  
6 University of Oxford, Oxford, UK; Paediatric Infectious Diseases Unit, St George's University  
7 Hospitals NHS Foundation Trust, London. charlene.rodrigues@zoo.ox.ac.uk

8 Keith A. Jolley, Department of Zoology, Peter Medawar Building for Pathogen Research, University  
9 of Oxford, Oxford, UK. keith.jolley@zoo.ox.ac.uk

10 Andrew Smith, Glasgow Dental School, University of Glasgow, UK; Scottish Microbiology Reference  
11 Laboratory, NHS Greater Glasgow & Clyde, Glasgow, Scotland, UK. andrew.smith@glasgow.ac.uk

12 J. Claire Cameron, Public Health Scotland, Glasgow, UK. clairecameron1@nhs.net

13 Ian M. Feavers, Department of Zoology, Peter Medawar Building for Pathogen Research, University of  
14 Oxford, Oxford, UK ian.feavers@zoo.ox.ac.uk

15 \*Martin C.J. Maiden, Department of Zoology, Peter Medawar Building for Pathogen Research,  
16 University of Oxford, Oxford, UK. martin.maiden@zoo.ox.ac.uk

17 \*Corresponding author

## 18 Abstract

19 As microbial genomics makes increasingly important contributions to clinical and public health  
20 microbiology, the interpretation of whole genome sequence data by non-specialists becomes essential.  
21 In the absence of capsule-based vaccines, two protein-based vaccines have been used for the prevention  
22 of invasive serogroup B meningococcal disease (IMD), since their licensure in 2013/14. These vaccines  
23 have different components and different coverage of meningococcal variants. Hence, decisions  
24 regarding which vaccine to use in managing serogroup B IMD outbreaks require information about the  
25 index case isolate including: (i) the presence of particular vaccine antigen variants; (ii) the expression  
26 of vaccine antigens; and (iii) the likely susceptibility of its antigen variants to antibody-dependent  
27 bactericidal killing. To obtain this information requires a multitude of laboratory assays, impractical in  
28 real-time clinical settings, where the information is most urgently needed. To facilitate assessment for  
29 public health and clinical purposes, we synthesised genomic and experimental data from published  
30 sources to develop and implement the ‘Meningococcal Deduced Vaccine Antigen Reactivity’  
31 (MenDeVAR) Index, which is publicly-available on PubMLST (<https://pubmlst.org>). Using whole  
32 genome sequences or individual gene sequences obtained from IMD isolates or clinical specimens,  
33 MenDeVAR provides rapid evidence-based information on the presence and possible immunological  
34 cross-reactivity of different meningococcal vaccine antigen variants. The MenDeVAR Index enables  
35 practitioners who are not genomics specialists to assess the likely reactivity of vaccines for individual  
36 cases, outbreak management, or the assessment of public health vaccine programmes. MenDeVAR has  
37 been developed in consultation with, but independently of, both vaccine manufacturers.

38 **Keywords:** Meningococcal disease, *Neisseria meningitidis*, vaccines, Meningococcal Antigen Typing  
39 System (MATS), Meningococcal Antigen Surface Expression (MEASURE) assay, serum bactericidal  
40 activity assay, outbreaks, whole genome sequencing, public health

## 41 Introduction

42 Microbial whole genome sequencing (WGS) has advanced our understanding of microbial evolution,  
43 diversity, and pathogenicity. Since the first bacterial genome was sequenced in 1995, the technology  
44 has developed from dideoxynucleotide terminator (Sanger) sequencing to multiplexed WGS platforms  
45 (1-3). Concomitantly, the cost of WGS has reduced substantially, increasing its availability and  
46 affordability worldwide; however, DNA sequencing itself is a first step, with multidisciplinary expertise  
47 required to exploit these complex large data sets to address particular questions and translate the results  
48 to public health action. Genomic technologies are increasingly incorporated into public health and  
49 clinical microbiology laboratories, where identifying and typing micro-organisms is critical to  
50 informing infectious disease management in individuals and populations. Extracting information from  
51 genomic data is important, but it is equally important to communicate these data promptly and  
52 effectively to relevant practitioners (4). Here we describe a generalizable framework for assimilating  
53 sequence data with phenotypic information, linking genotype to phenotype with the results presented  
54 as an easy to understand result for use by non-specialists.

55 Invasive meningococcal disease (IMD), caused by *Neisseria meningitidis*, is a serious infection with  
56 significant mortality and morbidity (5, 6). Diagnosis of IMD is either through bacterial culture and  
57 capsular group serotyping, or, in the absence of culture, by PCR testing, with additional discrimination  
58 provided by characterisation of capsule-encoding and protein antigen-encoding genes (7). IMD  
59 generally occurs sporadically but can occur in clusters and outbreaks, due to the transmission of  
60 hyperinvasive meningococcal variants generally or among individuals living in closed- or semi-closed  
61 communities such as schools, universities, military barracks, and extended households. Increasingly,  
62 real-time WGS of meningococcal isolates can direct public health investigations and interventions.

63 Prevention of IMD is possible by immunisation, delivered either by routine programmes or in response  
64 to clusters or outbreaks. When they occur, such outbreaks are a public health priority, requiring the  
65 rapid identification of individuals at high risk from the meningococcal variant identified in the index  
66 case. Prophylactic antibiotics are provided to close contacts to prevent outbreak strain transmission and  
67 vaccination offered where appropriate (8). While highly immunogenic conjugate protein-

68 polysaccharide vaccines are available against invasive meningococci expressing capsular serogroups  
69 A, C, W, and Y (9), there are none against serogroup B meningococci, which are a major cause of IMD  
70 outbreaks and clusters in many countries. In 2013 and 2014, two protein-based meningococcal vaccines  
71 were licensed to assist in the prevention of serogroup B IMD. The particular protein antigens contained  
72 in the two vaccines, 4CMenB (Bexsero<sup>®</sup>) and rLP2086 (Trumenba<sup>®</sup>), were different and not specific to  
73 serogroup B meningococci. These antigens also displayed immunologically significant protein  
74 sequence diversity (10, 11). Therefore, the two vaccines exhibit different degrees of possible protection  
75 against heterologous vaccine antigens and, consequently, there could be a need for frontline clinical and  
76 public health specialists to assess each vaccine rapidly in the context of a particular scenario to inform  
77 decisions about vaccine implementation.

78 Using WGS to provide clinically applicable information requires systematic and reproducible  
79 characterisation of genetic variation. Multilocus sequence typing (MLST), based on housekeeping  
80 genes, is the most widely-used approach to characterising bacterial variants, facilitating communication  
81 among laboratories internationally and the identification of hyperinvasive meningococci (12). Typing  
82 bacterial genetic diversity of medically important features, such as polysaccharide capsules (13, 14),  
83 antimicrobial resistance genes (15), and vaccine antigens (16) can be achieved through similar gene-  
84 by-gene approaches (17). For example, the Bexsero<sup>®</sup> Antigen Sequence Typing (BAST) scheme was  
85 established to characterise and describe vaccine antigen variants, using data derived through WGS or  
86 sequencing of individual genes (16).

87 Both vaccines contain factor H binding protein (fHbp), one recombinant peptide variant in Bexsero<sup>®</sup>  
88 (peptide 1) and two native lipidated peptide variants in Trumenba<sup>®</sup> (peptides 45 and 55) (11). Bexsero<sup>®</sup>  
89 also contains the recombinant proteins, Neisserial heparin-binding antigen (NHBA, peptide 2) and  
90 *Neisseria* adhesin A (NadA, peptide 8), combined with the PorA-containing (variable region (VR2),  
91 peptide 4) outer membrane vesicle from the MeNZB vaccine (10). The BAST scheme catalogues  
92 peptide presence/absence and variation, using deduced peptide sequences, but cannot infer protein  
93 expression or cross-reactivity. The Meningococcal Antigen Typing System (MATS) laboratory assay  
94 was devised to estimate the proportion of diverse serogroup B disease strains prevented by Bexsero<sup>®</sup>,

95 by assessing protein expression and cross-reactivity (18); however, MATS is not widely or immediately  
96 available in clinical settings and is time- and resource-intensive. Genetic MATS (gMATS) was  
97 developed to predict Bexsero<sup>®</sup> strain coverage using sequence and phenotypic MATS data. At the time  
98 of writing, this algorithm was not available on an accessible, integrated platform for genome sequence  
99 data analysis, nor had it been updated to accommodate the description of additional variants (19).

100 To perform genomic vaccine antigen analysis comprehensively requires an understanding of  
101 sequencing technology, genomic data quality control, and gene/peptide curation and analysis. As of  
102 mid-2020, these skills were developing amongst healthcare scientists/clinicians, but were far from  
103 universal (4). Given the need to assess breadth of vaccine reactivity and to ensure genomic data are  
104 harnessed to maximise clinical and public health benefit, we developed the ‘Meningococcal Deduced  
105 Vaccine Antigen Reactivity’ (MenDeVAR) Index, publicly-accessible on PubMLST *Neisseria* website  
106 (20). By synthesising published, peer reviewed, experimental data with sequence data, the MenDeVAR  
107 Index provides a means for public health and clinical practitioners to extract easily understood, relevant  
108 information from genomic data in real-time.

## 109 Methods

### 110 Vaccine antigen typing

111 Allele-based typing schemes for each of the antigens included in Bexsero<sup>®</sup> and Trumenba<sup>®</sup> have been  
112 published. The BAST scheme was developed as a multi-locus, rapid, and scalable method to catalogue  
113 deduced peptide diversity of meningococcal vaccine antigens (16). The scheme includes five peptide  
114 components contained in the Bexsero<sup>®</sup> vaccine: fHbp; NHBA; NadA; and PorA VR1 and VR2. Typing  
115 of Trumenba<sup>®</sup> vaccine antigen fHbp was available with cross-referencing to the subfamily A and B  
116 nomenclature, on PubMLST *Neisseria* website (21, 22). Novel peptide variants are curated in real-time  
117 after submission to PubMLST, these curated databases form the basis of the MenDeVAR Index.

### 118 Literature search

119 Determining the extent to which either protein-based vaccine is protective against a given  
120 meningococcus requires an assessment for each vaccine component of the protein sequence variant  
121 present, its surface expression, its likely recognition by vaccine-induced antibodies, and finally the  
122 likelihood of bactericidal killing of the meningococcus in the presence of vaccinee serum. These factors  
123 were assessed using published experimental studies for each vaccine. For Bexsero<sup>®</sup>, the MATS assay  
124 was used, which was established to assess the breadth of vaccine coverage to diverse meningococcal  
125 strains (18, 23). MATS determines the antigenic variants of fHbp, NHBA, and NadA through sandwich  
126 ELISA, and their reactivity to pooled toddler serum (post-vaccination with three doses and booster),  
127 based on a collection of reference strains tested in serum bactericidal activity (SBA) assays. For  
128 Trumenba<sup>®</sup>, the Meningococcal Antigen Surface Expression (MEASURE) assay (24), a flow  
129 cytometric measurement of fHbp surface expression, was used. Additionally, SBA assays using serum  
130 from individuals immunised with Trumenba<sup>®</sup> (2 or 3 doses, varying dosing schedules) were included,  
131 as there was only one vaccine antigen. Only antigens tested in these assays were analysed as  
132 contributing to a cross-protective vaccine effect for the MenDeVAR Index (Figure 1).

133 For Bexsero<sup>®</sup>, a literature search using the terms “Meningococcal Antigen Typing System” AND  
134 “*Neisseria meningitidis*” AND “vaccine” on 14<sup>th</sup> May 2020 yielded 44 studies published in English.  
135 There were 13 studies eligible for assessment (supplementary Table 4), pertaining to capsular group B

136 IMD isolates (MATS is only validated for serogroup B), with data of sufficient detail to assess  
137 individual antigens and their predicted vaccine coverage. For Trumenba<sup>®</sup>, a literature search using the  
138 terms “meningococcal antigen surface expression (MEASURE) assay” AND “*Neisseria meningitidis*”  
139 AND “vaccine” on the 14<sup>th</sup> May 2020 yielded 12 studies published in English. One study contained  
140 MEASURE assay data for individual antigenic variants (Table 2). Additionally, a literature search using  
141 the terms “serum bactericidal activity assay” AND “*Neisseria meningitidis*” AND “vaccine” AND  
142 “bivalent” on the 14<sup>th</sup> May 2020 yielded 28 studies published in English. Fifteen studies contained data  
143 to assess individual antigenic variants and their likelihood of providing protection using SBA assays  
144 (supplementary Table 5).

#### 145 **Criteria for defining cross-reactive antigens in the MenDeVAR Index**

146 To index the experimental data, thresholds were determined to define antigenic variants as either likely  
147 cross-reactive or not cross-reactive and the proportion of isolates with a given antigenic variant  
148 considered covered/protected through experimental assays was calculated. For each assay (MATS,  
149 MEASURE, and SBA), thresholds previously defined by the developers or the research community  
150 were employed. For the MATS assay, an antigenic variant was considered “covered” (i.e. would be  
151 susceptible to a vaccine-induced immune response) where the relative potency (RP) was greater than  
152 the positive bactericidal threshold (PBT) (18). For the MEASURE assay, an antigenic variant was  
153 considered “covered” if the mean fluorescent intensity (MFI) >1000 (24). For the SBA assay, antigenic  
154 variants were assessed through host immunogenicity, resulting in likely protection from infection. The  
155 accepted serological measure indicating likely protection by immunisation with meningococcal  
156 vaccines is either  $\geq 4$ -fold rise in antibody titres between pre- and post-vaccination sera or a titre >1:4  
157 (27, 28). From the combined analysis of the experimental studies, if an antigenic variant had been  
158 tested in  $\geq 5$  isolates and  $\geq 3/4$  of them were covered/protected, then the variant was considered cross-  
159 reactive (“amber”). If an antigenic variant had been tested in  $\geq 5$  isolates, and  $\geq 3/4$  of them were not  
160 covered/protected, then the variant was considered not cross-reactive (“red”) (Figure 1).

## 161 Development of data visualisation for the MenDeVAR Index

162 For ease of data presentation, a red, amber, green ‘traffic light’ data interpretation was employed:  
163 “green” was assigned to meningococcal variants with  $\geq 1$  antigenic vaccine variant, based on exact  
164 peptide sequence match; “amber” was assigned to isolates with  $\geq 1$  antigenic variant demonstrated as  
165 cross-reactive in experimental studies; and, “red” was assigned to isolates where all antigenic variants  
166 were not exact matches and had been shown to not elicit cross-reactivity to vaccine variants. The  
167 designation “grey” was assigned to variants possessing antigenic variants untested in experimental  
168 assays at the time of writing or where such tests did not meet the threshold chosen to indicate cross-  
169 reactivity. The MenDeVAR Index status of the variants, especially those designated as “grey”, will be  
170 updated in the light of the above criteria as further published information become available.

171 The MenDeVAR Index was implemented on the PubMLST *Neisseria* website on the isolate record  
172 (Figure 2a). In addition, WGS data or individual gene sequences can be used to make a direct query on  
173 [https://pubmlst.org/bigsub?db=pubmlst\\_neisseria\\_mendevar](https://pubmlst.org/bigsub?db=pubmlst_neisseria_mendevar), which outputs the MenDeVAR  
174 Index result, without the need to create isolate records or upload WGS data to the database (Figure 2b).  
175 A written description is provided to aid those with colour vision deficits, where “green” means “exact”,  
176 “amber” means “cross-reactive”, “red” means “none”, and grey means “insufficient data”. Additional,  
177 supporting information is provided: (i) the antigenic determinant of the reactivity index; (ii) the assay  
178 used to determine cross-reactivity; (iii) specific references to studies including those antigens; and (iv)  
179 caveats to interpretation (Table 1).

## 180 Case studies

181 To exemplify the application of the MenDeVAR Index, two published IMD outbreaks/clusters were  
182 analysed: a IMD outbreak amongst a semi-closed, Irish traveller community (2010-2013) (25); and a  
183 university IMD outbreak in the USA (2016) (26). Both WGS data available through PubMLST and  
184 published antigenic variants determined through WGS were examined.



## 185 Results

### 186 Cross-reactive vaccine antigens

187 For Bexsero<sup>®</sup> vaccine, MATS studies (29-41) were identified through literature searches. With the  
188 exception of two studies (34, 40) that used PBT for fHbp of 0.012, all other antigen RP were assessed  
189 against the PBT of 0.021 for fHbp, 0.294 for NHBA, and 0.009 for NadA (18). For each antigenic  
190 variant of fHbp, NHBA, and NadA, the proportion of isolates with a RP>PBT was calculated. For fHbp,  
191 there were 139 peptides examined by MATS assay, 28 (20.1%) tested in  $\geq 5$  isolates. For NHBA there  
192 were 110 peptides, 30 (27.3%) tested in  $\geq 5$  isolates. For NadA, there were 22 peptides, 5 (22.7%) tested  
193 in  $\geq 5$  isolates. For Trumenba<sup>®</sup> vaccine, each antigen tested by the MEASURE assay in one study (24)  
194 was evaluated. For fHbp, there were 9 peptides examined by MEASURE assay, 6 of which were tested  
195 in  $\geq 5$  isolates (Table 3). From SBA studies (42-56), there were 23 fHbp peptides examined by SBA  
196 assay, 23 (100.0%) tested in  $\geq 5$  isolates.

197 Antigenic variants that did not meet either cross-reactive or not cross-reactive threshold were designated  
198 as “grey”, indicating that insufficient data were available to make an assessment for this variant. This  
199 included variants: (i) tested in  $\geq 5$  isolates, with between  $\frac{1}{4}$  and  $\frac{3}{4}$  covered/protected (Table 2); (ii) tested  
200 in  $< 5$  isolates (for Bexsero<sup>®</sup> vaccine this was 111 fHbp peptides, 80 NHBA peptides, and 17 NadA  
201 peptides, and for Trumenba<sup>®</sup> vaccine 3 fHbp peptides tested by MEASURE assay); or (iii) not tested in  
202 experimental assays.

### 203 Designation of isolates with the MenDeVAR Index

204 A meningococcal variant was designated “green” if it contained at  $\geq 1$  exact sequence match to the  
205 vaccine antigenic variants. This was, for Bexsero<sup>®</sup>: fHbp peptide 1; NHBA peptide 2; NadA peptide 8;  
206 and PorA VR2,4 (16, 57). Similarly, for Trumenba<sup>®</sup> this corresponded to fHbp peptides 45 or 55 (11)  
207 (Table 2). The “amber” designation was used if a meningococcus contained  $\geq 1$  antigenic variant  
208 deemed cross-reactive from experimental studies, from any of fHbp, NHBA or NadA (Table 3). PorA  
209 peptides are not considered cross-reactive (58). Finally, the “red” designation was used for  
210 meningococci where none of its antigens present were exact matches with the vaccine antigens and its

211 antigen variants had been shown experimentally not to cross-react with antibodies elicited by the  
212 vaccine (Table 2).

### 213 [MenDeVAR Index: exemplar case studies](#)

#### 214 *Irish traveller community outbreak*

215 Retrospective analysis of a published IMD outbreak in the Republic of Ireland (2010-2013) (25),  
216 exemplified the potential use of the MenDeVAR Index in the context of a community outbreak, where  
217 a variety of clinical specimens were available. A total of eight cases were identified over 42-months  
218 (Table 4). The initial meningococcus, from Case A, was not cultured, but identification and typing data  
219 were acquired by PCR amplification and sequencing of MLST loci and fine-typing antigen-encoding  
220 genes *porA* and *fetA*. PorA VR2 antigen 4 was present, an exact peptide sequence match to Bexsero®.  
221 There was insufficient data to inform the use of Trumenba®, which contains only fHbp proteins. At the  
222 time of identification Case A was considered to be sporadic case and the appropriate public health action  
223 was antibiotic prophylaxis for close contacts. Using the MenDeVAR Index, the disease-associated  
224 meningococcus would have be designated “green” for Bexsero® and “grey” for Trumenba®. Of the  
225 seven cases subsequently linked to this case, only two were successfully cultured and WGS (Cases B  
226 and H), but five could have a MenDeVAR Index inferred from fine-typing antigen PorA, with respect  
227 to Bexsero® (Table 4). Additional molecular fHbp typing of isolates would inform the use of  
228 Trumenba®, in a setting where the PorA is not variant 4. These data identified 75% (6/8) of isolates,  
229 two with WGS, with sufficient information to designate as MenDeVAR Index “green” for Bexsero®  
230 and two WGS isolates with “amber” for Trumenba® (Table 3).

#### 231 *US university cluster*

232 A cluster of IMD occurring in the US (2016) (26) was examined to demonstrate the use the MenDeVAR  
233 Index in an institutional outbreak. In this cluster, two undergraduate students at a New Jersey university  
234 were diagnosed with serogroup B IMD, with meningococci isolated from the cerebrospinal fluid of both  
235 (26). These isolates were examined in real-time by WGS through the local public health department  
236 and were both sequence type 11 (clonal complex 11) and indistinguishable (Table 3). Antigenic variant  
237 data provided in the publication was assessed, which provided data equivalent to that obtained by

238 determining the antigenic variants through PCR and sequencing, if WGS had not been available. The  
239 meningococci causing the outbreak harboured fHbp variant 2 peptide 19, an antigen which is cross-  
240 reactive with Trumenba<sup>®</sup> (“amber”) but not cross-reactive with Bexsero<sup>®</sup> (“red”). The outbreak strains  
241 also had: (i) no *nadA* gene present (“red”); (ii) PorA 10-1 (“red”); and (iii) NHBA peptide 20, for which  
242 there is insufficient data to determine cross-reactivity with confidence (“grey”). The MenDeVAR Index  
243 therefore designated these isolates “amber” for Trumenba<sup>®</sup> and “grey” for Bexsero<sup>®</sup>, the latter based  
244 solely on the NHBA variant present, with remaining antigens “red”. This information could have  
245 directed public health specialists to using Trumenba<sup>®</sup> early after IMD cluster definition was met,  
246 preventing delays in health protection interventions including mass vaccination campaigns, frequently  
247 required in university settings.

## 248 Discussion

249 As bacterial genome sequencing has become increasingly accessible, the prospect of using genomic  
250 data for the benefit of public and individual health has become a reality. This opportunity is, however,  
251 fraught with challenges including: (i) the large and complex genomic datasets involved; (ii) the  
252 expertise required to understand the uses and limitations of WGS technologies; (iii) the increasing  
253 number and complexity of analysis tools; (iv) the requirement for skills with command-line interfaces;  
254 (v) insufficient bioinformatics or genomic epidemiology training amongst healthcare practitioners and  
255 scientists; and (vi) the diversity of the information sources that need to be integrated.

256 Genome sequence data provide information on the presence or absence of genes associated with  
257 clinically relevant phenotypes e.g. antibiotic susceptibility, pathogenicity or vaccine antigens. The first  
258 step in exploiting this information is to extract relevant data for the identification of the genes and the  
259 protein variants they encode (typing). The second step is to index these types to the relevant phenotypic  
260 data. The third step is to present the result in an accessible format for non-genomics specialists to inform  
261 clinical decision-making. Here, we demonstrated the MenDeVAR Index, which combines these steps  
262 into a system for rapid, real-time assessment of protein-based meningococcal vaccine antigens, for  
263 public health and clinical microbiology application.

264 The epidemiology of IMD varies geographically. Sporadic cases occur in countries where IMD is  
265 endemic, with clusters and outbreaks associated with high-density living conditions such as universities,  
266 military, or travelling communities (59). Endemic and hyper-endemic serogroup B IMD is problematic  
267 in many industrialised regions (60) and, in the absence of group B polysaccharide vaccines, protein-  
268 based vaccines (10, 11) have been developed. When IMD outbreaks emerge, it is essential to identify  
269 contacts and implement public health interventions rapidly. These include antibiotics and vaccinations,  
270 the latter, especially, requiring timely serogroup determination of the outbreak strain to ensure  
271 deployment of the appropriate vaccine (8). For serogroup B outbreaks, characterisation of peptide  
272 antigens is required to assess whether vaccination with Bexsero® and/or Trumenba® is likely to prevent  
273 disease (8). At the time of writing, this assessment was only possible using the laboratory assays  
274 established during the clinical development of these vaccines to assess their breadth of antigenic

275 coverage, namely the MATS, MEASURE, and SBA assays (18, 24, 28). These assays, however,  
276 required growth of the causative isolate, were confined to reference laboratories in a limited number of  
277 countries, and were time-consuming and expensive to perform (26, 61). Consequently, they could not  
278 be relied upon to inform timely public health interventions. At the same time, WGS has become  
279 increasingly accessible to microbiology laboratories, often in real-time or near real-time. Further, where  
280 meningococcal cultures were not available, PCR of fine-typing and fHbp antigens provided information  
281 that complements the phenotypic data compiled within the MenDeVAR Index. Interpreted by local  
282 microbiologists and epidemiologists in the context of other pertinent information, the MenDeVAR  
283 Index offers a pragmatic assessment of likely susceptibility of outbreak strains to vaccine-induced  
284 immunity, based on published data.

285 For the development of the MenDeVAR Index, robust, pragmatic criteria were used to assess the weight  
286 of evidence of potential antigenic cross-reactivity from four different sources. The SBA titre remained  
287 the accepted immune correlate of protection for assessing meningococcal vaccine efficacy; however,  
288 the SBA assay cannot be performed for routine IMD case isolates investigated as part of a public health  
289 response for many reasons including the availability of expertise, resources, time, human complement,  
290 and infant sera. The use of MATS and MEASURE assays, as means of assessing the breadth of  
291 antigenic coverage, generated the best data available. Data from MEASURE assays, however, were  
292 limited at the time of assessment and the MATS assay was suggested to provide a conservative estimate  
293 compared to SBA titre (36, 38, 41). SBA data were not included for Bexsero<sup>®</sup>, which as a multi-  
294 component vaccine could induce multiple antibody responses. Although the gMATS assay also used  
295 genotypic predictors of MATS phenotype, and predicted cross-reactivity in agreement with the  
296 MenDeVAR Index using similar criteria (fHbp peptides: 1, 4, 10, 12, 14, 15, 37, 110, 144, 215, 224,  
297 232; NHBA peptides 1, 5, 10, 113, 243, 607) (19), the gMATs system was only applicable to one of the  
298 two available protein-based vaccines. Moreover, it excluded NadA antigens as predictors, included  
299 some unpublished data, and had not been updated. The MenDeVAR Index can assist public health and  
300 microbiology specialists by compiling and indexing the complex data available in the published  
301 evaluation of hundreds of meningococcal antigenic variants, a total of 29 studies at the time of writing.

302 The MenDeVAR Index is accessible through a user-friendly webpage  
303 ([https://pubmlst.org/bigssdb?db=pubmlst\\_neisseria\\_mendevar](https://pubmlst.org/bigssdb?db=pubmlst_neisseria_mendevar)) that facilitates the submission of WGS  
304 data as single or multiple contigs, or as part of an isolate record on PubMLST *Neisseria* website.

305 The case studies explored here demonstrated how the MenDeVAR Index can be used as outbreaks  
306 developed, with the Irish outbreak showing how multiple types of information can be used effectively.  
307 Had the MenDeVAR Index been available at the time, it would have supported the use of the Bexsero<sup>®</sup>  
308 vaccine in this outbreak setting. The US university cluster demonstrated the difficulties faced by public  
309 health specialists in combining complex datasets from multiple sources in real-time to inform  
310 intervention strategies. This cluster was investigated by US Centers for Disease Control and the isolates  
311 were sent for laboratory testing at US universities, which is not a routine procedure. These analyses  
312 identified relatively low fHbp protein expression and low binding of NHBA peptide 2 antisera to the  
313 outbreak strain, suggesting reduced likelihood of bactericidal killing (26). Based on these data along  
314 with additional information about persistence of antibody responses post-vaccination, immunisation of  
315 ~35,000 university students with Trumenba<sup>®</sup> was recommended. The public health team acknowledged  
316 that WGS data indicated the presence or absence of particular antigenic variants, which could be  
317 compared to the respective vaccine antigens. When variants were not exact sequence matches, however,  
318 there was no additional information available to indicate potential cross-protection offered by the  
319 vaccine. In the case of this outbreak, the MenDeVAR Index would have supported the use of  
320 Trumenba<sup>®</sup>, solely on the basis of WGS data.

321 There are limitations to using the MenDeVAR Index, as it is based on WGS data linked to information  
322 from published *in vitro* MATS, MEASURE, and SBA serological studies, (Figure 3). These assays are  
323 not perfect surrogates of protection for a variety of reasons including the age groups used to establish  
324 the assays and the provenance of the isolates used in their development. Further, at the time of writing,  
325 the expression of the antigens could not be reliably inferred or predicted from WGS data, although some  
326 fHbp promoter and intergenic regions had been correlated with protein expression (65, 66). Finally, the  
327 MenDeVAR Index applies to only to possible direct protection against IMD, with no information

328 available about possible herd immunity due to the lack of evidence to suggest either vaccine impacted  
329 oropharyngeal carriage of serogroup B meningococci (62-64).

330 In conclusion, we present a generalizable multi-locus gene-by-gene framework for interpreting  
331 complex genomic datasets that can be used by practitioners to address clinical questions in a timely  
332 manner. Specifically, the MenDeVAR Index combines genomic and experimental data to provide a  
333 rational, evidence-based, estimate of the likelihood that either of the meningococcal protein-based  
334 vaccines offers protection against a given meningococcus. To ensure broad accessibility, the  
335 MenDeVAR Index is implemented with a ‘red’, ‘amber’, and ‘green’ interpretive interface that is easy  
336 to use and informative for practitioners without expertise in genomic analysis. In the light of new  
337 published evidence, the MenDeVAR Index can be regularly re-evaluated using the criteria described  
338 here, adjusting antigenic variant designations accordingly, to ensure that public health and clinical  
339 microbiologists globally benefit from the latest research findings.

#### 340 [Acknowledgements](#)

341 This publication made use of the Neisseria Multi Locus Sequence Typing website  
342 (<https://pubmlst.org/neisseria/>) sited at the University of Oxford (Jolley *et al.* Wellcome Open Res  
343 2018, 3:124. The development of this site has been funded by the Wellcome Trust and European  
344 Union.

## 345 References

- 346 1. **Sanger F, Nicklen S, Coulson AR.** 1977. DNA sequencing with chain-terminating inhibitors.  
347 Proceedings of the National Academy of Sciences of the USA 74:5463-5467.
- 348 2. **Fleischmann RD, Adams MD, White O, Clayton RA, Kirkness EF, Kerlavage AR, Bult CJ, Tomb**  
349 **JF, Dougherty BA, Merrick JM.** 1995. Whole-genome random sequencing and assembly of  
350 *Haemophilus influenzae* RD. Science 269:496-512.
- 351 3. **Forde BM, O'Toole PW.** 2013. Next-generation sequencing technologies and their impact on  
352 microbial genomics. Briefings in Functional Genomics 12:440-53.
- 353 4. **Black A, Maccannell DR, Sibley TR, Bedford T.** 2020. Ten recommendations for supporting  
354 open pathogen genomic analysis in public health. Nature Medicine doi:10.1038/s41591-020-  
355 0935-z.
- 356 5. **Ladhani SN, Flood JS, Ramsay ME, Campbell H, Gray SJ, Kaczmarski EB, Mallard RH, Guiver**  
357 **M, Newbold LS, Borrow R.** 2012. Invasive meningococcal disease in England and Wales:  
358 implications for the introduction of new vaccines. Vaccine 30:3710-6.
- 359 6. **Viner RM, Booy R, Johnson H, Edmunds WJ, Hudson L, Bedford H, Kaczmarski E, Rajput K,**  
360 **Ramsay M, Christie D.** 2012. Outcomes of invasive meningococcal serogroup B disease in  
361 children and adolescents (MOSAIC): a case-control study. Lancet Neurology 11:774-83.
- 362 7. **Rodrigues CMC, Lucidarme J, Borrow R, Smith A, Cameron JC, Moxon ER, Maiden MCJ.** 2018.  
363 Genomic Surveillance of 4CMenB Vaccine Antigenic Variants among Disease-Causing *Neisseria*  
364 *meningitidis* Isolates, United Kingdom, 2010-2016. Emerg Infect Dis 24:673-682.
- 365 8. **Public Health England.** 2013. Chapter 22 Meningococcal, p 24. In Ramsay M (ed),  
366 Immunisation against infectious disease.
- 367 9. **Finne J, Leinonen M, Makela PH.** 1983. Antigenic similarities between brain components and  
368 bacteria causing meningitis. Implications for vaccine development and pathogenesis. Lancet  
369 2:355-357.



- 370 10. **Serruto D, Bottomley MJ, Ram S, Giuliani MM, Rappuoli R.** 2012. The new multicomponent  
371 vaccine against meningococcal serogroup B, 4CMenB: Immunological, functional and  
372 structural characterization of the antigens. *Vaccine* 30:B87-B97.
- 373 11. **Jiang H-Q, Hoiseth SK, Harris SL, McNeil LK, Zhu D, Tan C, Scott AA, Alexander K, Mason K,**  
374 **Miller L, DaSilva I, Mack M, Zhao X-J, Pride MW, Andrew L, Murphy E, Hagen M, French R,**  
375 **Arora A, Jones TR, Jansen KU, Zlotnick GW, Anderson AS.** 2010. Broad vaccine coverage  
376 predicted for a bivalent recombinant factor H binding protein based vaccine to prevent  
377 serogroup B meningococcal disease. *Vaccine* 28:6086-6093.
- 378 12. **Maiden MCJ, Bygraves JA, Feil E, Morelli G, Russell JE, Urwin R, Zhang Q, Zhou J, Zurth K,**  
379 **Caugant DA, Feavers IM, Achtman M, Spratt BG.** 1998. Multilocus sequence typing: a  
380 portable approach to the identification of clones within populations of pathogenic  
381 microorganisms. *Proceedings of the National Academy of Sciences of the United States of*  
382 *America* 95:3140-3145.
- 383 13. **Marjuki H, Topaz N, Rodriguez-Rivera LD, Ramos E, Potts CC, Chen A, Retchless AC, Doho**  
384 **GH, Wang X.** 2019. Whole-Genome Sequencing for Characterization of Capsule Locus and  
385 Prediction of Serogroup of Invasive Meningococcal Isolates. *J Clin Microbiol* 57.
- 386 14. **Croucher NJ, Finkelstein JA, Pelton SI, Mitchell PK, Lee GM, Parkhill J, Bentley SD, Hanage**  
387 **WP, Lipsitch M.** 2013. Population genomics of post-vaccine changes in pneumococcal  
388 epidemiology. *Nature Genetics* 45:656-663.
- 389 15. **Harrison OB, Clemence M, Dillard JP, Tang CM, Trees D, Grad YH, Maiden MC.** 2016. Genomic  
390 analyses of *Neisseria gonorrhoeae* reveal an association of the gonococcal genetic island with  
391 antimicrobial resistance. *Journal of Infection* 73:578-587.
- 392 16. **Brehony C, Rodrigues CM, Borrow R, Smith A, Cunney R, Moxon ER, Maiden MC.** 2016.  
393 Distribution of Bexsero® Antigen Sequence Types (BASTs) in invasive meningococcal disease  
394 isolates: Implications for immunisation. *Vaccine* 34:4690-7.

- 395 17. **Maiden MC, Jansen van Rensburg MJ, Bray JE, Earle SG, Ford SA, Jolley KA, McCarthy ND.**  
396 2013. MLST revisited: the gene-by-gene approach to bacterial genomics. *Nature Reviews*  
397 *Microbiology* 11:728-736.
- 398 18. **Donnelly J, Medini D, Boccadifuoco G, Biolchi A, Ward J, Frasci C, Moxon ER, Stella M,**  
399 **Comanducci M, Bambini S, Muzzi A, Andrews W, Chen J, Santos G, Santini L, Boucher P,**  
400 **Serruto D, Pizza M, Rappuoli R, Giuliani MM.** 2010. Qualitative and quantitative assessment  
401 of meningococcal antigens to evaluate the potential strain coverage of protein-based  
402 vaccines. *Proceedings of the National Academy of Sciences of the United States of America*  
403 107:19490-19495.
- 404 19. **Muzzi A, Brozzi A, Serino L, Bodini M, Abad R, Caugant D, Comanducci M, Lemos AP, Gorla**  
405 **MC, Křížová P, Mikula C, Mulhall R, Nissen M, Nohynek H, Simões MJ, Skoczyńska A,**  
406 **Stefanelli P, Taha M-K, Toropainen M, Tzanakaki G, Vadivelu-Pechai K, Watson P, Vazquez**  
407 **JA, Rajam G, Rappuoli R, Borrow R, Medini D.** 2019. Genetic Meningococcal Antigen Typing  
408 System (gMATS): A genotyping tool that predicts 4CMenB strain coverage worldwide. *Vaccine*  
409 37:991-1000.
- 410 20. **Jolley KA, Bray JE, Maiden MCJ.** 2018. Open-access bacterial population genomics: BIGSdb  
411 software, the PubMLST.org website and their applications. *Wellcome Open Res* 3:124.
- 412 21. **Brehony C, Wilson DJ, Maiden MC.** 2009. Variation of the factor H-binding protein of *Neisseria*  
413 *meningitidis*. *Microbiology* 155:4155-4169.
- 414 22. **Fletcher LD, Bernfield L, Barniak V, Farley JE, Howell A, Knauf M, Ooi P, Smith RP, Weise P,**  
415 **Wetherell M, Xie X, Zagursky R, Zhang Y, Zlotnick GW.** 2004. Vaccine potential of the  
416 *Neisseria meningitidis* 2086 lipoprotein. *Infect Immun* 72:2088-100.
- 417 23. **Anderson RM, Donnelly CA, Gupta S.** 1997. Vaccine design, evaluation, and community based  
418 use for antigenically variable infectious agents. *Lancet* 350:1466-70.
- 419 24. **McNeil LK, Donald RGK, Gribenko A, French R, Lambert N, Harris SL, Jones TR, Li S, Zlotnick**  
420 **G, Vogel U, Claus H, Abad R, Vazquez JA, Borrow R, Findlow J, Taha MK, Deghmane AE,**

- 421 **Caugant DA, Kriz P, Musilek M, Wang X, Vuong J, Mayer LW, Pride MW, Jansen KU, Anderson**  
422 **AS.** 2018. Predicting the Susceptibility of Meningococcal Serogroup B Isolates to Bactericidal  
423 Antibodies Elicited by Bivalent rLP2086, a Novel Prophylactic Vaccine. *MBio* 9.
- 424 25. **Mulhall RM, Brehony C, O'Connor L, Meyler K, Jolley KA, Bray J, Bennett D, Maiden MC,**  
425 **Cunney R.** 2016. Resolution of a protracted serogroup B meningococcal outbreak with whole  
426 genome sequencing shows inter species genetic transfer. *J Clin Microbiol* 54:2891-2899.
- 427 26. **Soeters HM, Dinitz-Sklar J, Kulkarni PA, MacNeil JR, McNamara LA, Zaremski E, Chang HY,**  
428 **Lujan E, Granoff D, Lasky M, Montana B.** 2017. Serogroup B Meningococcal Disease Vaccine  
429 Recommendations at a University, New Jersey, USA, 2016. *Emerg Infect Dis* 23:867-869.
- 430 27. **Borrow R, Balmer P, Miller E.** 2005. Meningococcal surrogates of protection-serum  
431 bactericidal antibody activity. *Vaccine* 23:2222-7.
- 432 28. **Borrow R, Carlone GM, Rosenstein N, Blake M, Feavers I, Martin D, Zollinger W, Robbins J,**  
433 **Aaberge I, Granoff DM, Miller E, Plikaytis B, van Alphen L, Poolman J, Rappuoli R, Danzig L,**  
434 **Hackell J, Danve B, Caulfield M, Lambert S, Stephens D.** 2006. Neisseria meningitidis group B  
435 correlates of protection and assay standardization--international meeting report Emory  
436 University, Atlanta, Georgia, United States, 16-17 March 2005. *Vaccine* 24:5093-107.
- 437 29. **Abad R, Medina V, Stella M, Boccadifuoco G, Comanducci M, Bambini S, Muzzi A, Vazquez**  
438 **JA.** 2016. Predicted Strain Coverage of a New Meningococcal Multicomponent Vaccine  
439 (4CMenB) in Spain: Analysis of the Differences with Other European Countries. *PLoS One*  
440 11:e0150721.
- 441 30. **Bettinger JA, Scheifele DW, Le Saux N, Halperin SA, Vaudry W, Tsang R.** 2013. The disease  
442 burden of invasive meningococcal serogroup B disease in Canada. *Pediatric Infectious Disease*  
443 *Journal* 32:e20-e25.
- 444 31. **Budroni S, Kleinschmidt A, Boucher P, Medini D.** 2016. Pooled-sera hSBA titres predict  
445 individual seroprotection in infants and toddlers vaccinated with 4CMenB. *Vaccine* 34:2579-  
446 84.

- 447 32. **Mowlaboccus S, Perkins TT, Smith H, Sloots T, Tozer S, Prempeh LJ, Tay CY, Peters F, Speers**  
448 **D, Keil AD, Kahler CM.** 2016. Temporal Changes in BEXSERO® Antigen Sequence Type  
449 Associated with Genetic Lineages of *Neisseria meningitidis* over a 15-Year Period in Western  
450 Australia. PLoS One 11:e0158315.
- 451 33. **Mulhall RM, Bennett D, Cunney R, Borrow R, Lucidarme J, Findlow J, Jolley KA, Bray J,**  
452 **Maiden MCJ, Moschioni M, Serino L, Stella M, Medini D.** 2018. Potential Coverage of the  
453 4CMenB Vaccine against Invasive Serogroup B *Neisseria meningitidis* Isolated from 2009 to  
454 2013 in the Republic of Ireland. mSphere 3.
- 455 34. **Parikh SR, Newbold L, Slater S, Stella M, Moschioni M, Lucidarme J, De Paola R, Giuliani M,**  
456 **Serino L, Gray SJ, Clark SA, Findlow J, Pizza M, Ramsay ME, Ladhani SN, Borrow R.** 2017.  
457 Meningococcal serogroup B strain coverage of the multicomponent 4CMenB vaccine with  
458 corresponding regional distribution and clinical characteristics in England, Wales, and  
459 Northern Ireland, 2007-08 and 2014-15: a qualitative and quantitative assessment. Lancet  
460 Infectious Diseases 17:754-762.
- 461 35. **Rajam G, Stella M, Kim E, Paulos S, Boccadifuoco G, Serino L, Carlone G, Medini D.** 2017.  
462 Meningococcal Antigen Typing System (MATS)-Based *Neisseria meningitidis* Serogroup B  
463 Coverage Prediction for the MenB-4C Vaccine in the United States. mSphere 2.
- 464 36. **Vogel U, Taha MK, Vazquez JA, Findlow J, Claus H, Stefanelli P, Caugant DA, Kriz P, Abad R,**  
465 **Bambini S, Carannante A, Deghmane AE, Fazio C, Frosch M, Frosi G, Gilchrist S, Giuliani MM,**  
466 **Hong E, Ledroit M, Lovaglio PG, Lucidarme J, Musilek M, Muzzi A, Oksnes J, Rigat F, Orlandi**  
467 **L, Stella M, Thompson D, Pizza M, Rappuoli R, Serruto D, Comanducci M, Boccadifuoco G,**  
468 **Donnelly JJ, Medini D, Borrow R.** 2013. Predicted strain coverage of a meningococcal  
469 multicomponent vaccine (4CMenB) in Europe: a qualitative and quantitative assessment.  
470 Lancet Infectious Diseases 13:416-425.

- 471 37. **Wasko I, Hong E, De Paola R, Stella M, Moschioni M, Taha MK, Skoczynska A.** 2016. High  
472 predicted strain coverage by the multicomponent meningococcal serogroup B vaccine  
473 (4CMenB) in Poland. *Vaccine* 34:510-515.
- 474 38. **Abad R, Biolchi A, Moschioni M, Giuliani MM, Pizza M, Vazquez JA.** 2015. A large portion of  
475 meningococcal antigen typing system-negative meningococcal strains from Spain is killed by  
476 sera from adolescents and infants immunized with 4CMenB. *Clinical and Vaccine Immunology*  
477 22:357-60.
- 478 39. **Green LR, Lucidarme J, Dave N, Chan H, Clark S, Borrow R, Bayliss CD.** 2018. Phase Variation  
479 of NadA in Invasive *Neisseria meningitidis* Isolates Impacts on Coverage Estimates for 4C-  
480 MenB, a MenB Vaccine. *J Clin Microbiol* 56.
- 481 40. **Kesanopoulos K, Bratcher HB, Hong E, Xirogianni A, Papandreou A, Taha MK, Maiden MCJ,**  
482 **Tzanakaki G.** 2018. Characterization of meningococcal carriage isolates from Greece by whole  
483 genome sequencing: Implications for 4CMenB vaccine implementation. *PLoS One*  
484 13:e0209919.
- 485 41. **Stella M, Giuliani M, Biolchi A, Tomei S, De Paola R, Bai X, Borrow R, Lucidarme J, La Gaetana**  
486 **R, Toneatto D, Pizza M, Serino L, Mori E, Giuliani MM.** 2020. Does vaccination with 4CMenB  
487 convey protection against meningococcal serogroup B strains not predicted to be covered by  
488 MATS? A study of the UK clonal complex cc269. *Human Vaccines & Immunotherapy* 16:945-  
489 948.
- 490 42. **Harris SL, Donald RG, Hawkins JC, Tan C, O'Neill R, McNeil LK, Perez JL, Anderson AS, Jansen**  
491 **KU, Jones TR.** 2017. *Neisseria meningitidis* Serogroup B Vaccine, Bivalent rLP2086, Induces  
492 Broad Serum Bactericidal Activity Against Diverse Invasive Disease Strains Including Outbreak  
493 Strains. *Pediatric Infectious Diseases Journal* 36:216-223.
- 494 43. **Lujan E, Partridge E, Giuntini S, Ram S, Granoff DM.** 2017. Breadth and Duration of  
495 Meningococcal Serum Bactericidal Activity in Health Care Workers and Microbiologists  
496 Immunized with the MenB-FHbp Vaccine. *Clinical and Vaccine Immunology* 24.

- 497 44. **Taha MK, Hawkins JC, Liberator P, Deghmane AE, Andrew L, Hao L, Jones TR, McNeil LK,**  
498 **O'Neill RE, Perez JL, Jansen KU, Anderson AS.** 2017. Bactericidal activity of sera from  
499 adolescents vaccinated with bivalent rLP2086 against meningococcal serogroup B outbreak  
500 strains from France. *Vaccine* 35:1530-1537.
- 501 45. **Ostergaard L, Vesikari T, Absalon J, Beeslaar J, Ward BJ, Senders S, Eiden JJ, Jansen KU,**  
502 **Anderson AS, York LJ, Jones TR, Harris SL, O'Neill R, Radley D, Maansson R, Pregaldien JL,**  
503 **Ginis J, Staerke NB, Perez JL, B, Investigators BT.** 2017. A Bivalent Meningococcal B Vaccine  
504 in Adolescents and Young Adults. *New England Journal of Medicine* 377:2349-2362.
- 505 46. **Marshall HS, Richmond PC, Beeslaar J, Jiang Q, Jansen KU, Garces-Sanchez M, Martinon-**  
506 **Torres F, Szenborn L, Wysocki J, Eiden J, Harris SL, Jones TR, Lee SS, Perez JL, Investigators**  
507 **AS.** 2017. Meningococcal serogroup B-specific responses after vaccination with bivalent  
508 rLP2086: 4 year follow-up of a randomised, single-blind, placebo-controlled, phase 2 trial.  
509 *Lancet Infect Dis* 17:58-67.
- 510 47. **Muse D, Christensen S, Bhuyan P, Absalon J, Eiden JJ, Jones TR, York LJ, Jansen KU, O'Neill**  
511 **RE, Harris SL, Perez JL.** 2016. A Phase 2, Randomized, Active-controlled, Observer-blinded  
512 Study to Assess the Immunogenicity, Tolerability and Safety of Bivalent rLP2086, a  
513 Meningococcal Serogroup B Vaccine, Coadministered With Tetanus, Diphtheria and Acellular  
514 Pertussis Vaccine and Serogroup A, C, Y and W-135 Meningococcal Conjugate Vaccine in  
515 Healthy US Adolescents. *Pediatric Infectious Diseases Journal* 35:673-82.
- 516 48. **Senders S, Bhuyan P, Jiang Q, Absalon J, Eiden JJ, Jones TR, York LJ, Jansen KU, O'Neill RE,**  
517 **Harris SL, Ginis J, Perez JL.** 2016. Immunogenicity, Tolerability and Safety in Adolescents of  
518 Bivalent rLP2086, a Meningococcal Serogroup B Vaccine, Coadministered with Quadrivalent  
519 Human Papilloma Virus Vaccine. *Pediatric Infectious Diseases Journal* 35:548-54.
- 520 49. **Vesikari T, Wysocki J, Beeslaar J, Eiden J, Jiang Q, Jansen KU, Jones TR, Harris SL, O'Neill RE,**  
521 **York LJ, Perez JL.** 2016. Immunogenicity, Safety, and Tolerability of Bivalent rLP2086  
522 Meningococcal Group B Vaccine Administered Concomitantly With Diphtheria, Tetanus, and

- 523           Acellular Pertussis and Inactivated Poliomyelitis Vaccines to Healthy Adolescents. *Journal of*  
524           the Pediatric Infectious Disease Society 5:180-7.
- 525   50.   **Reiner DM, Bhuyan P, Eiden JJ, Ginis J, Harris S, Jansen KU, Jiang Q, Jones TR, O'Neill RE, York**  
526           **LJ, Perez JL.** 2016. Immunogenicity, safety, and tolerability of the meningococcal serogroup B  
527           bivalent rLP2086 vaccine in adult laboratory workers. *Vaccine* 34:809-13.
- 528   51.   **Marshall HS, Richmond PC, Nissen MD, Wouters A, Baber J, Jiang Q, Anderson AS, Jones TR,**  
529           **Harris SL, Jansen KU, Perez JL.** 2013. A phase 2 open-label safety and immunogenicity study  
530           of a meningococcal B bivalent rLP2086 vaccine in healthy adults. *Vaccine* 31:1569-75.
- 531   52.   **Vesikari T, Ostergaard L, Diez-Domingo J, Wysocki J, Flodmark CE, Beeslaar J, Eiden J, Jiang**  
532           **Q, Jansen KU, Jones TR, Harris SL, O'Neill RE, York LJ, Crowther G, Perez JL.** 2016.  
533           Meningococcal Serogroup B Bivalent rLP2086 Vaccine Elicits Broad and Robust Serum  
534           Bactericidal Responses in Healthy Adolescents. *Journal of the Pediatric Infectious Disease*  
535           *Society* 5:152-60.
- 536   53.   **Nissen MD, Marshall HS, Richmond PC, Jiang Q, Harris SL, Jones TR, Jansen KU, Perez JL.**  
537           2013. A randomized, controlled, phase 1/2 trial of a *Neisseria meningitidis* serogroup B  
538           bivalent rLP2086 vaccine in healthy children and adolescents. *Pediatr Infect Dis J* 32:364-71.
- 539   54.   **Richmond PC, Nissen MD, Marshall HS, Lambert SB, Roberton D, Gruber WC, Jones TR, Arora**  
540           **A.** 2012. A bivalent *Neisseria meningitidis* recombinant lipidated factor H binding protein  
541           vaccine in young adults: results of a randomised, controlled, dose-escalation phase 1 trial.  
542           *Vaccine* 30:6163-74.
- 543   55.   **Richmond PC, Marshall HS, Nissen MD, Jiang Q, Jansen KU, Garces-Sanchez M, Martinon-**  
544           **Torres F, Beeslaar J, Szenborn L, Wysocki J, Eiden J, Harris SL, Jones TR, Perez JL.** 2012. Safety,  
545           immunogenicity, and tolerability of meningococcal serogroup B bivalent recombinant  
546           lipoprotein 2086 vaccine in healthy adolescents: a randomised, single-blind, placebo-  
547           controlled, phase 2 trial. *Lancet Infectious Diseases* 12:597-607.

- 548 56. **Marshall HS, Richmond PC, Nissen MD, Jiang Q, Anderson AS, Jansen KU, Reynolds G, Ziegler**  
549 **JB, Harris SL, Jones TR, Perez JL.** 2012. Safety and Immunogenicity of a Meningococcal B  
550 Bivalent rLP2086 Vaccine in Healthy Toddlers Aged 18-36 Months: A Phase 1 Randomized-  
551 controlled Clinical Trial. *Pediatr Infect Dis J* 31:1061-1068.
- 552 57. **Su EL, Snape MD.** 2011. A combination recombinant protein and outer membrane vesicle  
553 vaccine against serogroup B meningococcal disease. *Expert Review of Vaccines* 10:575-88.
- 554 58. **Tappero JW, Lagos R, Ballesteros AM, Plikaytis B, Williams D, Dykes J, Gheesling LL, Carlone**  
555 **GM, Hoiby EA, Holst J, Nokleby H, Rosenqvist E, Sierra G, Campa C, Sotolongo F, Vega J,**  
556 **Garcia J, Herrera P, Poolman JT, Perkins BA.** 1999. Immunogenicity of 2 serogroup B outer-  
557 membrane protein meningococcal vaccines: a randomized controlled trial in Chile. *Jama*  
558 281:1520-7.
- 559 59. **Acevedo R, Bai X, Borrow R, Caugant DA, Carlos J, Ceyhan M, Christensen H, Climent Y, De**  
560 **Wals P, Dinleyici EC, Echaniz-Aviles G, Hakawi A, Kamiya H, Karachaliou A, Lucidarme J,**  
561 **Meiring S, Mironov K, Safadi MAP, Shao Z, Smith V, Steffen R, Stenmark B, Taha MK, Trotter**  
562 **C, Vazquez JA, Zhu B.** 2018. The Global Meningococcal Initiative meeting on prevention of  
563 meningococcal disease worldwide: epidemiology, surveillance, hypervirulent strains,  
564 antibiotic resistance and high-risk populations. *Expert Review of Vaccines*  
565 doi:10.1080/14760584.2019.1557520.
- 566 60. **Sridhar S, Greenwood B, Head C, Plotkin SA, Safadi MA, Saha S, Taha MK, Tomori O, Gessner**  
567 **BD.** 2015. Global incidence of serogroup B invasive meningococcal disease: a systematic  
568 review. *Lancet Infectious Diseases* 15:1334-46.
- 569 61. **Clark SA, Lucidarme J, Angel G, Lekshmi A, Morales-Aza B, Willerton L, Campbell H, Gray SJ,**  
570 **Ladhani SN, Wade M, Ramsay M, Yates J, Finn A, Borrow R.** 2019. Outbreak strain  
571 characterisation and pharyngeal carriage detection following a protracted group B  
572 meningococcal outbreak in adolescents in South-West England. *Scientific Reports* 9:9990.



- 573 62. **Marshall HS, McMillan M, Koehler AP, Lawrence A, Sullivan TR, MacLennan JM, Maiden**  
574 **MCJ, Ladhani SN, Ramsay ME, Trotter C, Borrow R, Finn A, Kahler CM, Whelan J, Vadivelu K,**  
575 **Richmond P.** 2020. Meningococcal B Vaccine and Meningococcal Carriage in Adolescents in  
576 Australia. *New England Journal of Medicine* 382:318-327.
- 577 63. **Read RC, Baxter D, Chadwick DR, Faust SN, Finn A, Gordon SB, Heath PT, Lewis DJ, Pollard**  
578 **AJ, Turner DP, Bazaz R, Ganguli A, Havelock T, Neal KR, Okike IO, Morales-Aza B, Patel K,**  
579 **Snape MD, Williams J, Gilchrist S, Gray SJ, Maiden MC, Toneatto D, Wang H, McCarthy M,**  
580 **Dull PM, Borrow R.** 2014. Effect of a quadrivalent meningococcal ACWY glycoconjugate or a  
581 serogroup B meningococcal vaccine on meningococcal carriage: an observer-blind, phase 3  
582 randomised clinical trial. *Lancet* 384:2123-31.
- 583 64. **Soeters HM, McNamara LA, Whaley M, Wang X, Alexander-Scott N, Kanadianian KV, Kelleher**  
584 **CM, MacNeil J, Martin SW, Raines N, Sears S, Vanner C, Vuong J, Bandy U, Sicard K, Patel M,**  
585 **Centers for Disease C.** 2015. Serogroup B Meningococcal Disease Outbreak and Carriage  
586 Evaluation at a College - Rhode Island, 2015. *MMWR Morbidity and Mortality Weekly Report*  
587 64:606-7.
- 588 65. **Biagini M, Spinsanti M, De Angelis G, Tomei S, Ferlenghi I, Scarselli M, Rigat F, Messuti N,**  
589 **Biolchi A, Muzzi A, Anderloni G, Brunelli B, Cartocci E, Buricchi F, Tani C, Stella M, Moschioni**  
590 **M, Del Tordello E, Colaprico A, Savino S, Giuliani MM, Delany I, Pizza M, Costantino P, Norais**  
591 **N, Rappuoli R, Masignani V.** 2016. Expression of factor H binding protein in meningococcal  
592 strains can vary at least 15-fold and is genetically determined. *Proceedings of the National*  
593 *Academy of Sciences of the United States of America* 113:2714-9.
- 594 66. **Cayrou C, Akinduko AA, Mirkes EM, Lucidarme J, Clark SA, Green LR, Cooper HJ, Morrissey**  
595 **J, Borrow R, Bayliss CD.** 2018. Clustered intergenic region sequences as predictors of factor H  
596 Binding Protein expression patterns and for assessing *Neisseria meningitidis* strain coverage  
597 by meningococcal vaccines. *PLoS One* 13:e0197186.

598

599 **Figure legends**

600 **Figure 1:** The Meningococcal Deduced Vaccine Antigen Reactivity (MenDeVAR) Index algorithm  
601 used to identify which antigens are included as cross-reactive in the combined analysis of published  
602 experimental data from: Meningococcal Antigen Typing System (MATS)<sup>18</sup>; Meningococcal Antigen  
603 Surface Expression (MEASURE) assay<sup>24</sup>; and serum bactericidal activity (SBA) assay<sup>27</sup>. RP (relative  
604 potency), PBT (Positive bactericidal threshold), MFI (mean fluorescence intensity).

605 **Figure 2:** (a) The Meningococcal Deduced Vaccine Antigen Reactivity (MenDeVAR) Index as it  
606 appears on the isolate record page of the <https://PubMLST.org/neisseria> website. The provenance data  
607 shows the PubMLST id is 19992, states this is a serogroup B meningococcal isolate from the Eastern  
608 region of the UK, collected from invasive disease in 2010. The MenDeVAR Index is shown under the  
609 secondary metadata heading, and shows this isolate contains cross-reactive antigens for both vaccines,  
610 with fHbp peptide 15 the antigen used to determine this through the MATS assay for Bexsero® and the  
611 MEASURE and SBA assays for Trumenba®, reference shown with PubMed ID (PMID). (b) The web  
612 interface to search using genome sequence, individual genes or whole genome data to output the  
613 MenDeVAR Index.

614 **Table 1:** The caveats that are listed on the PubMLST *Neisseria* website when interpreting the  
615 Meningococcal Deduced Vaccine Antigen Reactivity (MenDeVAR) Index.

616 **Table 3/2:** Vaccine antigen variants for the protein-based meningococcal vaccines Bexsero® (4CMenB)  
617 and Trumenba® (rLP2086) and their designation by Meningococcal Deduced Vaccine Antigen  
618 Reactivity (MenDeVAR) Index as: “green”, exact matches to the sequence variants; “amber”, cross-  
619 reactive in experimental studies; “red”, not cross-reactive in experimental studies; “grey”, insufficient  
620 data”. fHbp, factor H binding protein; NHBA, Neisserial heparin-binding antigen; NadA, Neisseria  
621 adhesin A; PorA VR2, Porin A variable region.

622 **Table 4/3:** Two examples of outbreak/clusters from published literature, showing the molecular typing  
623 data used to determine the MenDeVAR (Meningococcal Deduced Vaccine Antigen Reactivity) Index.  
624 ST, sequence type; cc, clonal complex; PorA VR, Porin A variable region; FetA, enterobactin receptor

625 FetA; fHbp, factor H binding protein; NHBA, Neisserial heparin-binding antigen; NadA, *Neisseria*  
626 adhesin A; BAST, Bexsero<sup>®</sup> Antigen Sequence Type.

627 **Supplementary data**

628 **Table 4:** Experimental studies identified through literature search to determine the cross-reactive  
629 antigenic variants to Bexsero<sup>®</sup> (4CMenB) vaccine included for combined analysis.

630 **Table 5:** Experimental studies identified through literature search to determine the cross-reactive  
631 antigenic variants to Trumenba<sup>®</sup> (rLP2086) vaccine included for combined analysis.

632

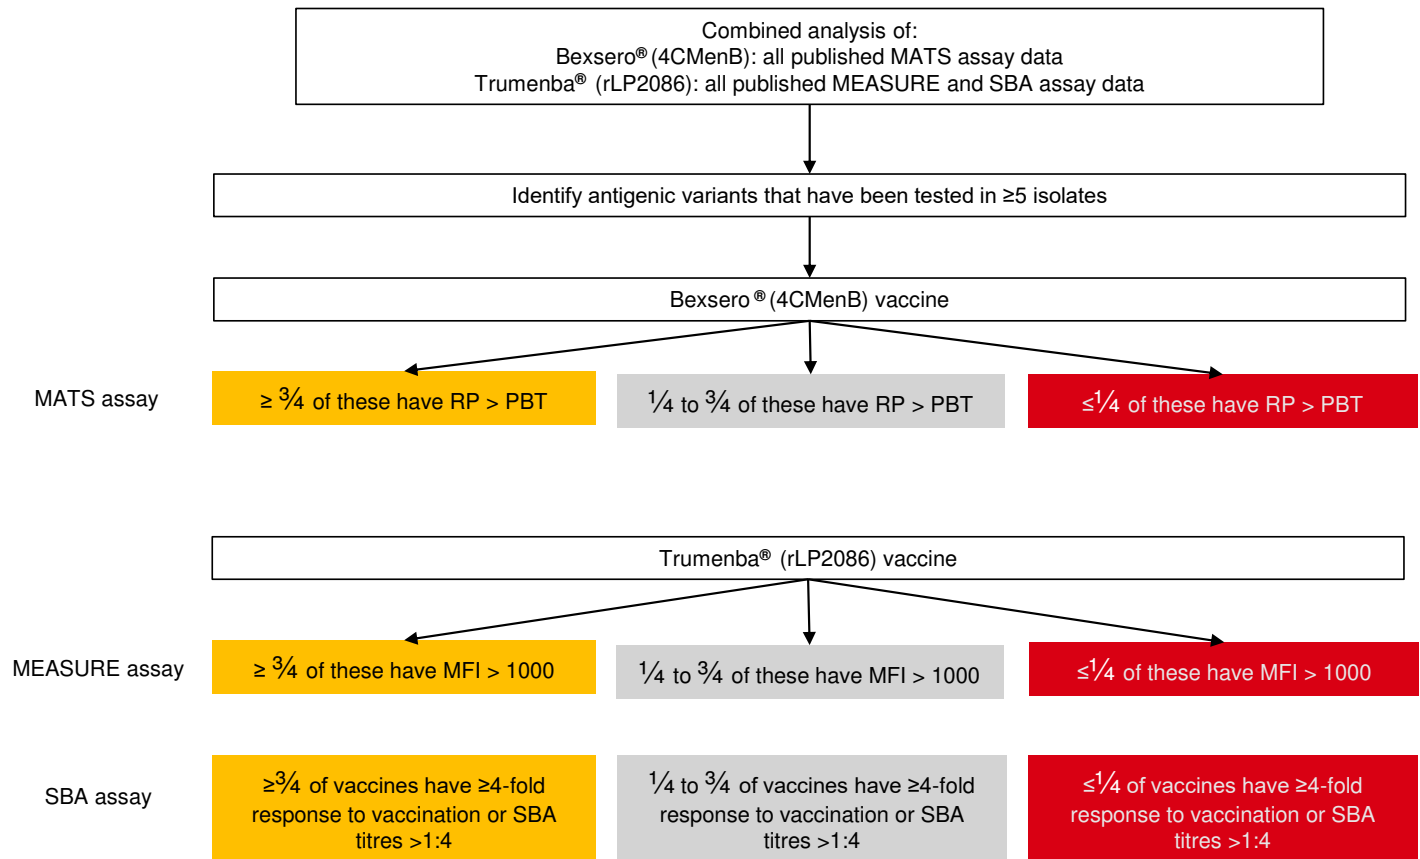

Figure 1: The Meningococcal Deduced Vaccine Antigen Reactivity (MenDeVAR) Index algorithm used to identify which antigens are included as cross-reactive in the combined analysis of published experimental data from: Meningococcal Antigen Typing System (MATS)18; Meningococcal Antigen Surface Expression (MEASURE) assay24; and serum bactericidal activity (SBA) assay27. RP (relative potency), PBT (Positive bactericidal threshold), MFI (mean fluorescence intensity).

(a)

 **Provenance/primary metadata**

|                                                              |                                              |                                                                                       |
|--------------------------------------------------------------|----------------------------------------------|---------------------------------------------------------------------------------------|
| <b>id:</b> 19992                                             | <b>year:</b> 2010                            | <b>capsule group:</b> B                                                               |
| <b>isolate:</b> M10 240568                                   | <b>epidemiological year:</b> 07/2010-06/2011 | <b>ENA run accession:</b> ERR170963 <a href="https://www.ebi.ac.uk">www.ebi.ac.uk</a> |
| <b>strain designation:</b> B: P1.22,14: F5-5: ST-213 (cc213) | <b>disease:</b> invasive (unspecified/other) | <b>sender:</b> Dorothea Hill, University of Oxford, UK                                |
| <b>country:</b> UK [England]                                 | <b>species:</b> Neisseria meningitidis       | <b>curator:</b> Auto Tagger                                                           |
| <b>continent:</b> Europe                                     | <b>serogroup:</b> B                          | <b>update history:</b> 173 updates <a href="#">show details</a>                       |
| <b>region:</b> Eastern                                       | <b>genogroup:</b> B                          | <b>date entered:</b> 2012-09-05                                                       |
|                                                              |                                              | <b>datestamp:</b> 2020-04-16                                                          |

 **Secondary metadata**

 **Vaccines**

|                                                                                                                                                                                                                                                     |                                                                                                                                |                                                                                                                                                                                                                                                                                                                                      |
|-----------------------------------------------------------------------------------------------------------------------------------------------------------------------------------------------------------------------------------------------------|--------------------------------------------------------------------------------------------------------------------------------|--------------------------------------------------------------------------------------------------------------------------------------------------------------------------------------------------------------------------------------------------------------------------------------------------------------------------------------|
| <b>Bexsero reactivity:</b> cross-reactive                                                                                                                          | <b>Trumenba reactivity:</b> cross-reactive  | <b>Trumenba notes:</b> fHbp_peptide: 15 is cross-reactive to vaccine variant - data derived from MEASURE assays (PMID:29535195), and SBA assays (PMID:22569484, PMID:22718089, PMID:23352429, PMID:26407272, PMID:26707218, PMID:26803328, PMID:26835974, PMID:27745812, PMID:27846061, PMID:28196734, PMID:28566335, PMID:29236639) |
| <b>Bexsero notes:</b> fHbp_peptide: 15 is cross-reactive to vaccine variant - data derived from MATS assays (PMID:23414709, PMID:23588089, PMID:26686998, PMID:26950303, PMID:27355628, PMID:28366725, PMID:30135218, PMID:30592763, PMID:31770063) |                                                                                                                                |                                                                                                                                                                                                                                                                                                                                      |

Figure 2: (a) The Meningococcal Deduced Vaccine Antigen Reactivity (MenDeVAR) Index as it appears on the isolate record page of the <https://PubMLST.org/neisseria> website. The provenance data shows the PubMLST id is 19992, states this is a serogroup B meningococcal isolate from the Eastern region of the UK, collected from invasive disease in 2010. The MenDeVAR Index is shown under the secondary metadata heading, and shows this isolate contains cross-reactive antigens for both vaccines, with fHbp peptide 15 the antigen used to determine this through the MATS assay for Bexsero® and the MEASURE and SBA assays for Trumenba®, reference shown with PubMed ID (PMID). (b) The web interface to search using genome sequence, individual genes or whole genome data to output the MenDeVAR Index.

(b)

## MenDeVAR (Meningococcal Deduced Vaccine Antigen Reactivity) Index

Please paste in your sequence to query against the database. Please note that this may take a while (~60 s) for a genome assembly.

Enter query sequence (single or multiple contigs up to whole genome in size)

```
>19992
ATGAACGCCCGTTTTCCGCTCAGCCTGCTCTCGCTTACCCTGGCGGCAAGTTTTGCC
CATGCGCAGAAAATATGCCAATATCGCATTGGATACCGTTACCGTAAAAGCGACCGC
CAAGGAGCAAAATCCGTACCAACATCGTTACGCTTCAACAAAAGACGAAAGCACCGCA
ACCGATATGCGCGAACTTTAAAAGAAGAGCGCTCCATCGATTTCCGGCGGCAACGGC
ACGTCCTCAATTCTGACGCTGCGCGCATGGGTGAGAAGCTGTGACATCAAGTGGAC
```

Alternatively upload FASTA file

Select FASTA file:

Choose file No file chosen

Action

Reset

Submit

### Matches

fHbp\_peptide: 15

NHBA\_peptide: 18

NadA\_peptide: missing - CDS has frameshift, internal stop codon or IS element

PorA\_VR2: 14

### Vaccine cross-reactivity

Bexsero®

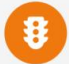

- fHbp\_peptide: 15 is cross-reactive to vaccine variant - data derived from MATS assays (PMID:23414709, PMID:23588089, PMID:26686998, PMID:26950303, PMID:27355628, PMID:28366725, PMID:30135218, PMID:30592763, PMID:31770063)

cross-reactive

Trumenba®

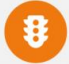

- fHbp\_peptide: 15 is cross-reactive to vaccine variant - data derived from MEASURE assays (PMID:29535195), and SBA assays (PMID:22569484, PMID:22718089, PMID:23352429, PMID:26407272, PMID:26707218, PMID:26803328, PMID:26835974, PMID:27745812, PMID:27846061, PMID:28196734, PMID:28566335, PMID:29236639)

cross-reactive

Table 1: The caveats that are listed on the PubMLST *Neisseria* website when interpreting the MenDeVAR (Meningococcal Deduced Vaccine Antigen Reactivity) Index. PMID (Pubmed identifier)

|                                     | <b>Bexsero® vaccine</b>                                                                                                                                                                                                                                                                                    | <b>Trumenba® vaccine</b>                                                                                                                                                                                                                                                                                     |
|-------------------------------------|------------------------------------------------------------------------------------------------------------------------------------------------------------------------------------------------------------------------------------------------------------------------------------------------------------|--------------------------------------------------------------------------------------------------------------------------------------------------------------------------------------------------------------------------------------------------------------------------------------------------------------|
| <b>Source of data</b>               | These data combine multiple sources of information including: peptide sequence identity through whole genome sequencing; experimental assays developed as indirect measures of the breadth of vaccine protection against diverse meningococci; and assays developed to assess immunogenicity.              |                                                                                                                                                                                                                                                                                                              |
| <b>Protein expression</b>           | We have not inferred protein expression from genomic data, therefore there may be isolates that possess genes but do not express the protein <i>in vivo</i> .                                                                                                                                              |                                                                                                                                                                                                                                                                                                              |
| <b>Cross-reactivity definition</b>  | An antigenic variant was considered cross-reactive if it had been tested in ≥5 isolates/subjects and was above the accepted threshold in ≥3/4 of those isolates. This was established through combined analysis of published experimental studies (PMID provided for each variant), not from genomic data. |                                                                                                                                                                                                                                                                                                              |
| <b>Meningococcal isolate source</b> | These assays were based on serogroup B disease isolates for both vaccines.                                                                                                                                                                                                                                 |                                                                                                                                                                                                                                                                                                              |
| <b>Experimental assays</b>          | <ul style="list-style-type: none"> <li>• Meningococcal Antigen Typing System (MATS) assay.</li> </ul>                                                                                                                                                                                                      | <ul style="list-style-type: none"> <li>• Meningococcal antigen surface expression (MEASURE) assay.</li> <li>• Serum bactericidal activity (SBA) assay.</li> </ul>                                                                                                                                            |
| <b>Age of vaccinees</b>             | <ul style="list-style-type: none"> <li>• For MATS assay development, Bexsero® vaccine recipients were infants who had received 3 doses of vaccine and then a booster at 12 months.</li> <li>• The pooled sera used for the MATS assay were taken from the toddlers at 13 months of age.</li> </ul>         | <ul style="list-style-type: none"> <li>• The age of vaccine recipients in the experimental studies varies widely, ranging from toddlers to adults, and needs to be taken into consideration when interpreting results.</li> <li>• Vaccine studies used different schedules and doses of vaccines.</li> </ul> |

Table 2: Vaccine antigen variants for the protein-based meningococcal vaccines Bexsero® (4CMenB) and Trumenba® (rLP2086) and their designation by Meningococcal Deduced Vaccine Antigen Reactivity (MenDeVAR) Index as: “green”, exact matches to the sequence variants; “amber”, cross-reactive in experimental studies; “red”, not cross-reactive in experimental studies; “grey”, insufficient data”. fHbp, factor H binding protein; NHBA, Neisserial heparin-binding antigen; NadA, Neisseria adhesin A; PorA VR2, Porin A variable region.

| MenDeVAR Index                  | Antigen requirement | fHbp                                                                              | NHBA                                                                                         | NadA                                                  | PorA VR2 |
|---------------------------------|---------------------|-----------------------------------------------------------------------------------|----------------------------------------------------------------------------------------------|-------------------------------------------------------|----------|
| <b>Bexsero® vaccine</b>         |                     |                                                                                   |                                                                                              |                                                       |          |
| <b>Green (exact)</b>            | ≥1 of:              | 1                                                                                 | 2                                                                                            | 8                                                     | 4        |
| <b>Amber (cross-reactive)</b>   | ≥1 of:              | 4, 10, 12, 14, 15, 37, 110, 144, 215, 232                                         | 1, 5, 10, 113, 243, 607                                                                      | 3, 6                                                  | -        |
| <b>Red (none)</b>               | All 4:              | 16, 19, 21, 22, 24, 25, 29, 30, 31, 45, 47, 59, 76, 109, 119                      | 6, 9, 17, 18, 25, 30, 31, 43, 47, 63, 112, 120, 160, 187, 197                                | 1, 21, 100                                            | ≠4       |
| <b>Grey (insufficient data)</b> | None of the above   | 13, 321 and other antigens that have not been experimentally tested               | 3, 20, 21, 24, 29, 115, 118, 130 and other antigens that have not been experimentally tested | Any antigens that have not been experimentally tested | -        |
| <b>Trumenba® vaccine</b>        |                     |                                                                                   |                                                                                              |                                                       |          |
| <b>Green (exact)</b>            | 1 of:               | 45, 55                                                                            |                                                                                              |                                                       |          |
| <b>Amber (cross-reactive)</b>   | 1 of:               | 1, 4, 13, 14, 15, 16, 19, 21, 23, 25, 30, 47, 49, 76, 87, 180, 187, 252, 276, 510 |                                                                                              |                                                       |          |
| <b>Red (none)</b>               | 1 of:               | -                                                                                 |                                                                                              |                                                       |          |
| <b>Grey (insufficient data)</b> | None of the above   | 13, 24 or other antigens that have not been experimentally tested                 |                                                                                              |                                                       |          |



Table 3: Two examples of outbreak/clusters from published literature, showing the molecular typing data used to determine the MenDeVAR (Meningococcal Deduced Vaccine Antigen Reactivity) Index. ST, sequence type; cc, clonal complex; PorA VR, Porin A variable region; FetA, enterobactin receptor FetA; fHbp, factor H binding protein; NHBA, Neisserial heparin-binding antigen; NadA, Neisseria adhesin A; BAST, Bexsero® Antigen Sequence Type.

| Cases                                     | Year | Capsular group | ST                      | cc               | PorA typing | FetA typing | fHbp peptide | NHBA peptide | NadA peptide | PorA VR1 | PorA VR2 | BAST                    | Bexsero® MenDeVAR Index | Trumenba® MenDeVAR Index | PubMLST id |
|-------------------------------------------|------|----------------|-------------------------|------------------|-------------|-------------|--------------|--------------|--------------|----------|----------|-------------------------|-------------------------|--------------------------|------------|
| <b>Irish traveller community outbreak</b> |      |                |                         |                  |             |             |              |              |              |          |          |                         |                         |                          |            |
| Case A                                    | 2010 | B              | Incomplete MLST profile | ST-41/44 complex | 7-2,4       | F1-21       | no data      | no data      | no data      | 7-2      | 4        | -                       | Green                   | Grey                     | -          |
| Case B                                    | 2010 | B              | 6697                    | ST-41/44 complex | 7-2,4       | F1-21       | 4            | 607          | 0            | 7-2      | 4        | 381                     | Green                   | Amber                    | 26834      |
| Case C                                    | 2011 | B              | 6697                    | ST-41/44 complex | 7-2,4       | F5-12       | no data      | no data      | no data      | 7-2      | 4        | -                       | Green                   | Grey                     | -          |
| Case D                                    | 2012 | B              | Incomplete MLST profile | -                | -           | no data     | no data      | no data      | no data      | no data  | no data  | -                       | -                       | -                        | -          |
| Case E                                    | 2013 | B              | 6697                    | ST-41/44 complex | 7-2,4       | F5-12       | no data      | no data      | no data      | 7-2      | 4        | -                       | Green                   | Grey                     | -          |
| Case F                                    | 2013 | B              | Incomplete MLST profile | ST-41/44 complex | 7-2,4       | no data     | no data      | no data      | no data      | 7-2      | 4        | -                       | Green                   | Grey                     | -          |
| Case G                                    | 2013 | B              | No data                 | -                | -           | no data     | no data      | no data      | no data      | no data  | no data  | -                       | -                       | -                        | -          |
| Case H                                    | 2013 | B              | 6697                    | ST-41/44 complex | 7-2,4       | F5-12       | 4            | truncated    | 0            | 7-2      | 4        | Incomplete BAST profile | Green                   | Amber                    | 30743      |
| <b>US university cluster</b>              |      |                |                         |                  |             |             |              |              |              |          |          |                         |                         |                          |            |
| Case 1                                    | 2016 | B              | 11                      | 11               | 5-1 , 10-1  | no data     | 19           | 20           | 0            | 5-1      | 10-1     | 3545                    | Grey                    | Amber                    | -          |
| Case 2                                    | 2016 | B              | 11                      | 11               | 5-1 , 10-1  | no data     | 19           | 20           | 0            | 5-1      | 10-1     | 3545                    | Grey                    | Amber                    | -          |
